# Supplementary material for: Facile preparation of a novel nickel-containing metallopolymer via RAFT polymerization
Source: PubMed Central journal article supplement (PMC5812193; doi:10.1080/15685551.2016.1257378), 2016-11-21
Supplement: TDMP_A_1257378_SM2443.pdf [file TDMP_A_1257378_SM2443.pdf]

## Supporting Information

## Facile Preparation of a Novel Nickel-Containing Metallopolymer via RAFT Polymerization

Rong Ren, Yanhua Wang, Dizheng Liu, Weilin Sun\*

## Supporting Information

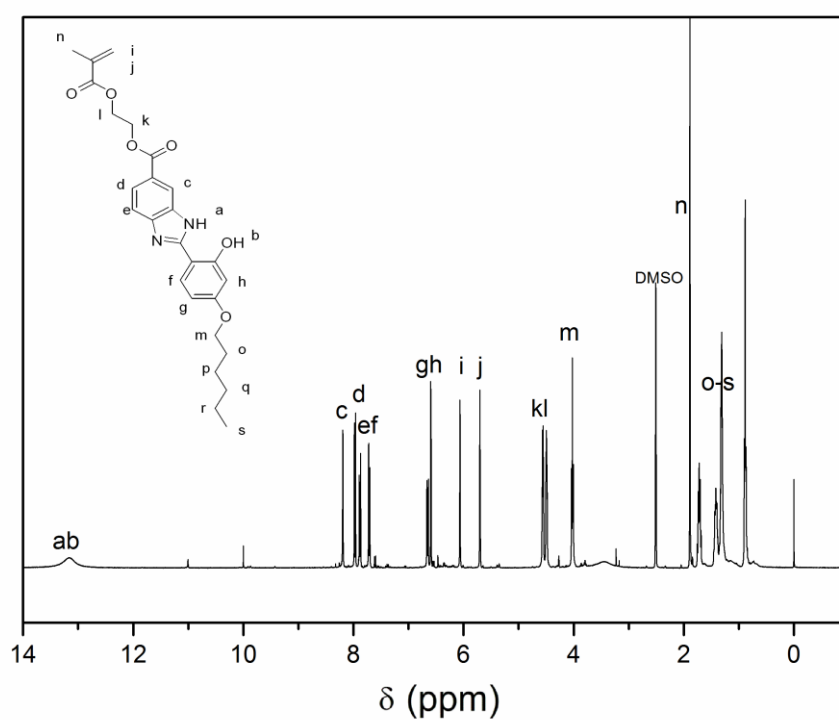

Figure S1. <sup>1</sup>H NMR spectrum of benzimidazole derivatives.

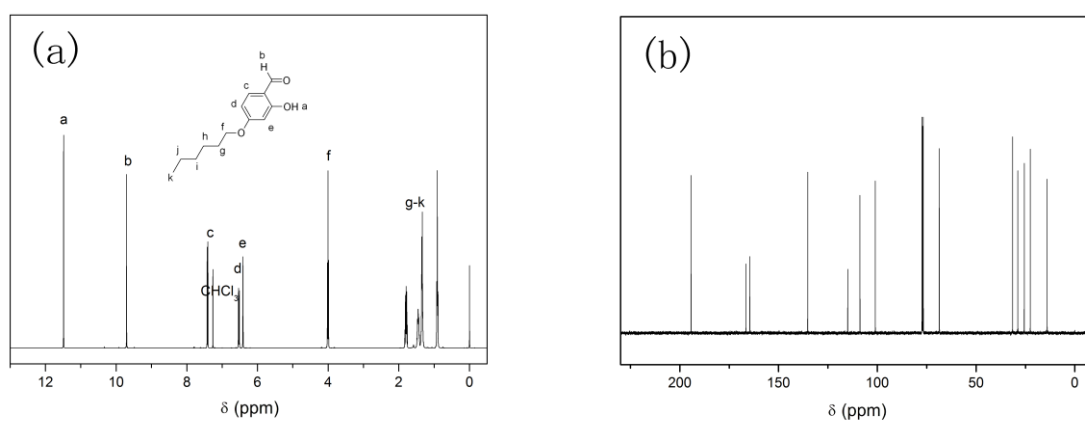

Figure S2.  $^1\text{H}$  NMR (a) and  $^{13}\text{C}$  NMR (b) spectra of 4-Hexyloxysalicylaldehyde.

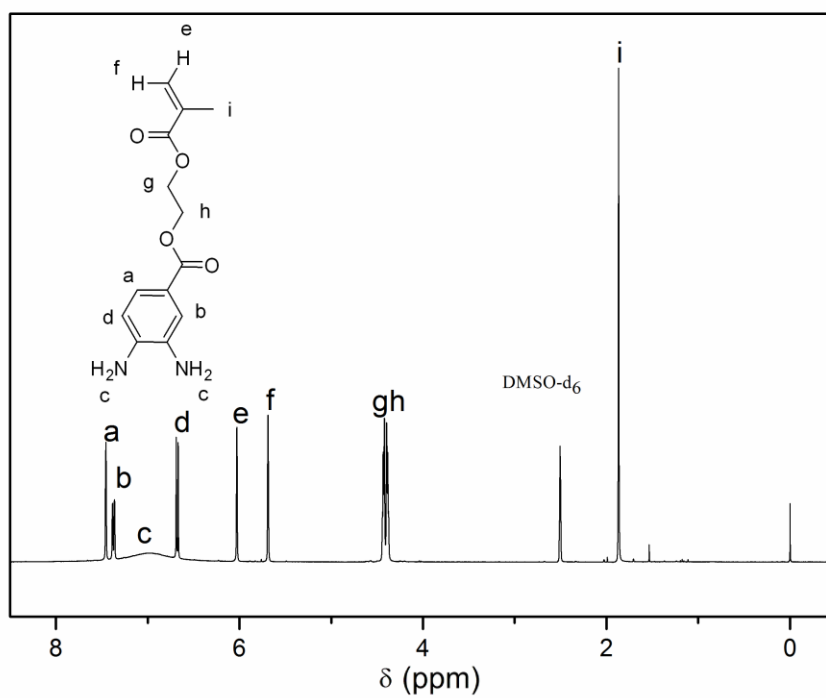

Figure S3.  $^1\text{H}$  NMR spectrum of HEMA-DBBA.

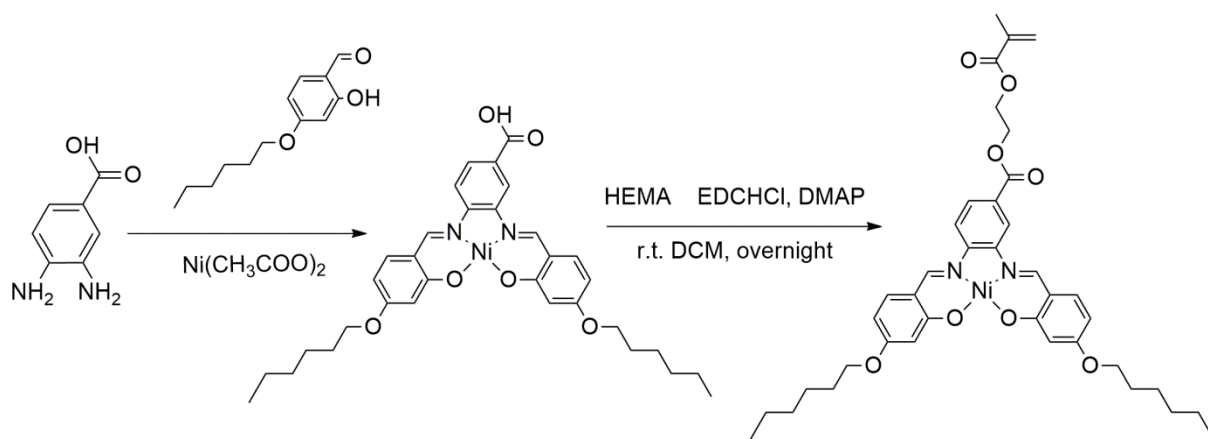

*Scheme S1.* Synthetic Route to HEMA-Salphen-Ni.

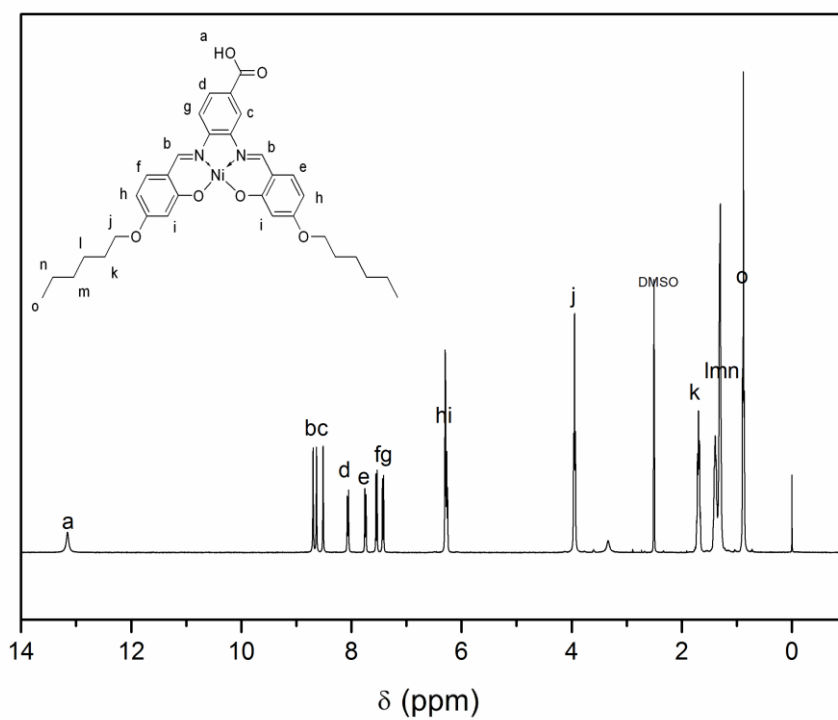

*Figure S4.*  $^1\text{H}$  NMR spectrum of SalphenNi-COOH.

Attempted synthesis of HEMA-Salphen-Cu (HSCu), HEMA-Salphen-Zn (HSZn) and their polymers

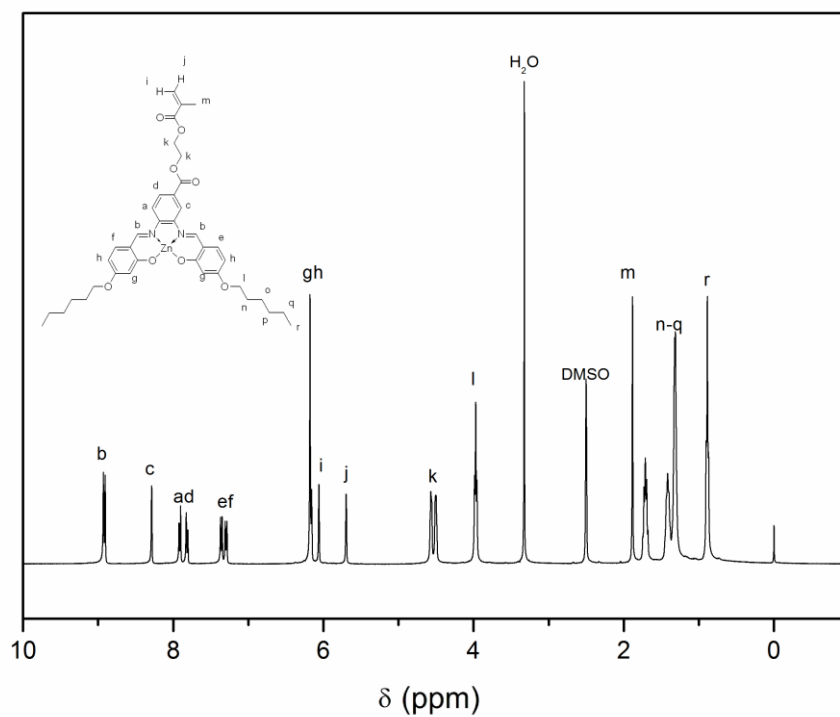

Figure S5.  $^1\text{H}$  NMR spectrum of HSZn.

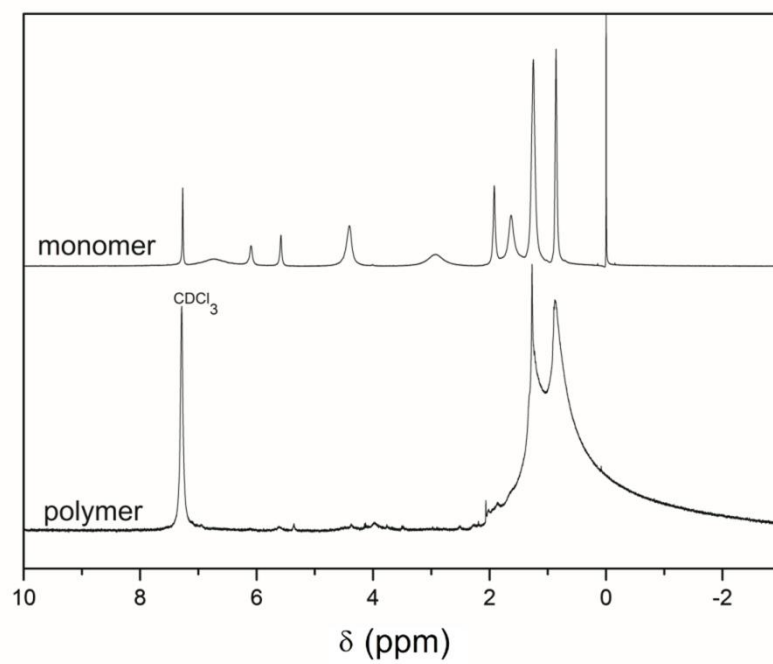

Figure S6.  $^1\text{H}$  NMR spectra of HSCu and PHSCu.

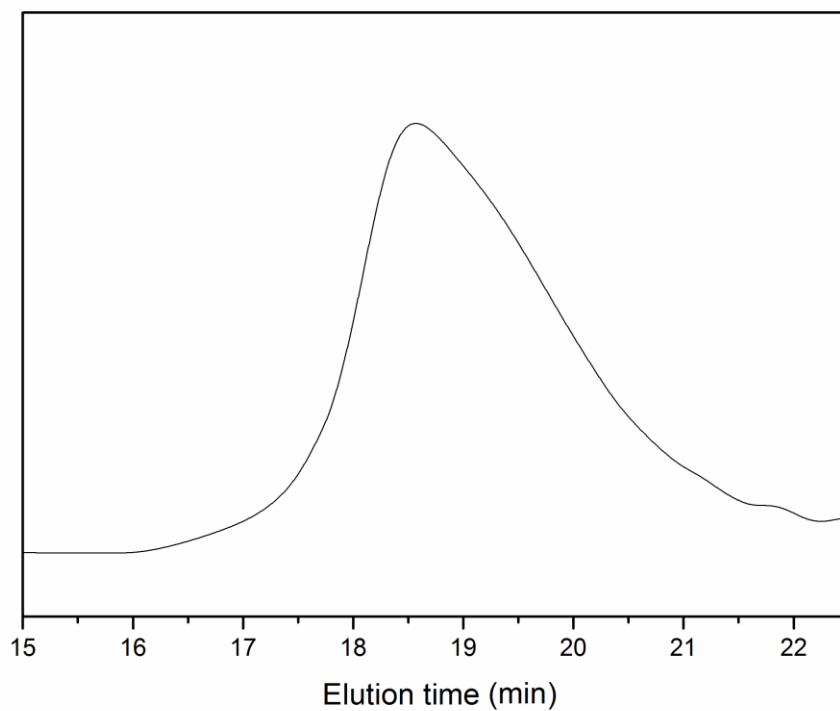

Figure S7. GPC curve of PHSCu with Mn=2380, Mw/Mn=1.39.

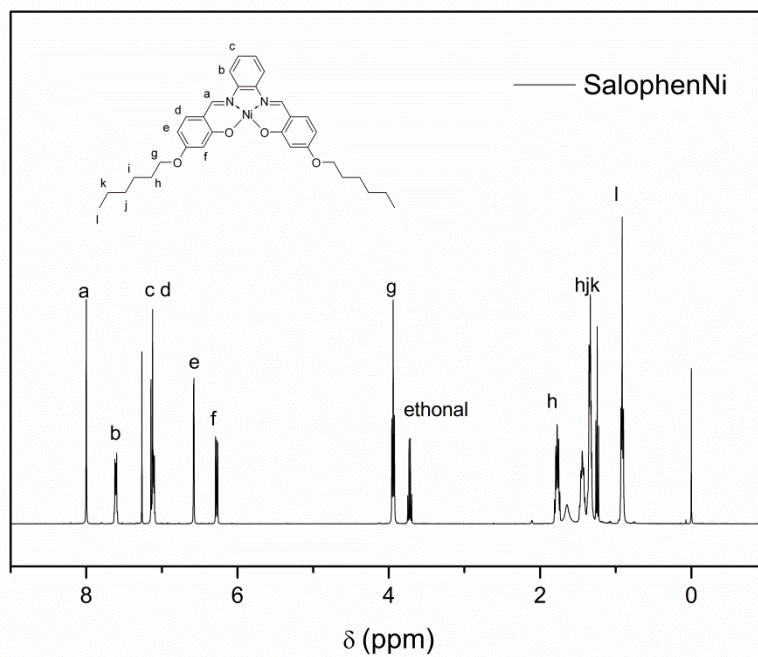

Figure S8. Structure and <sup>1</sup>H NMR spectrum of SalophenNi.

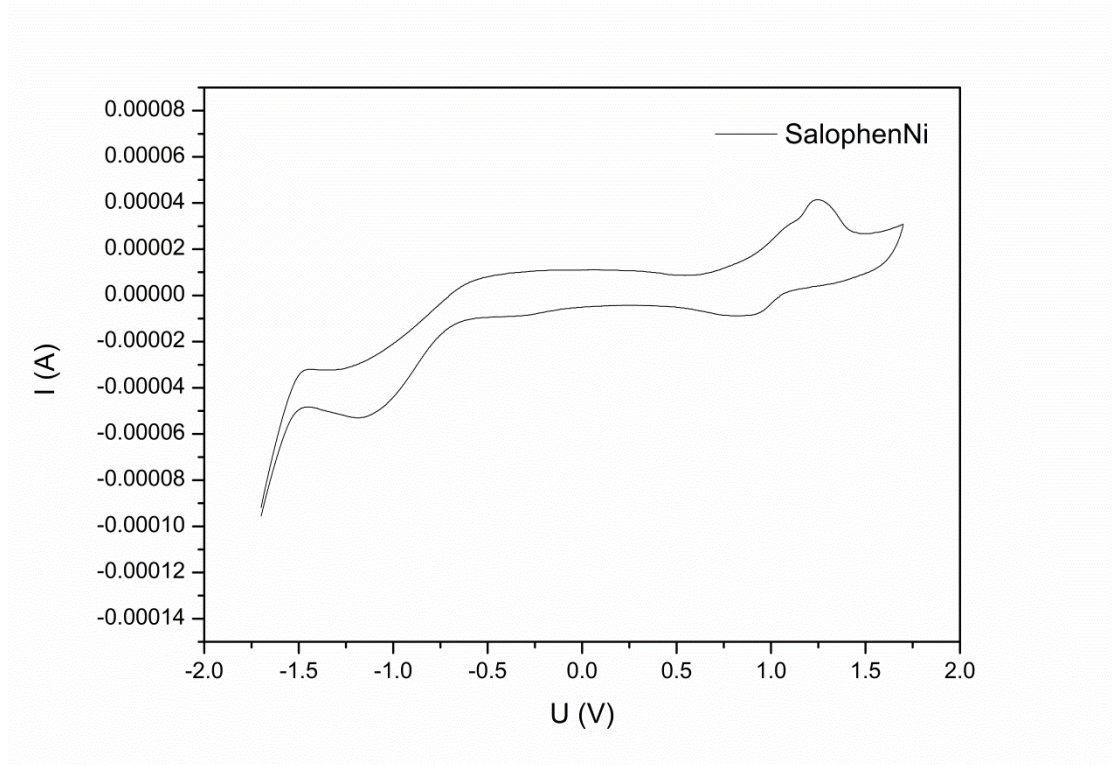

Figure S9. Cyclic voltammety curve of SalophenNi in degassed  $\text{CH}_2\text{Cl}_2$  with  $\text{TBAPF}_6$  as supporting electrolyte, scan rate = 100 mV/s.

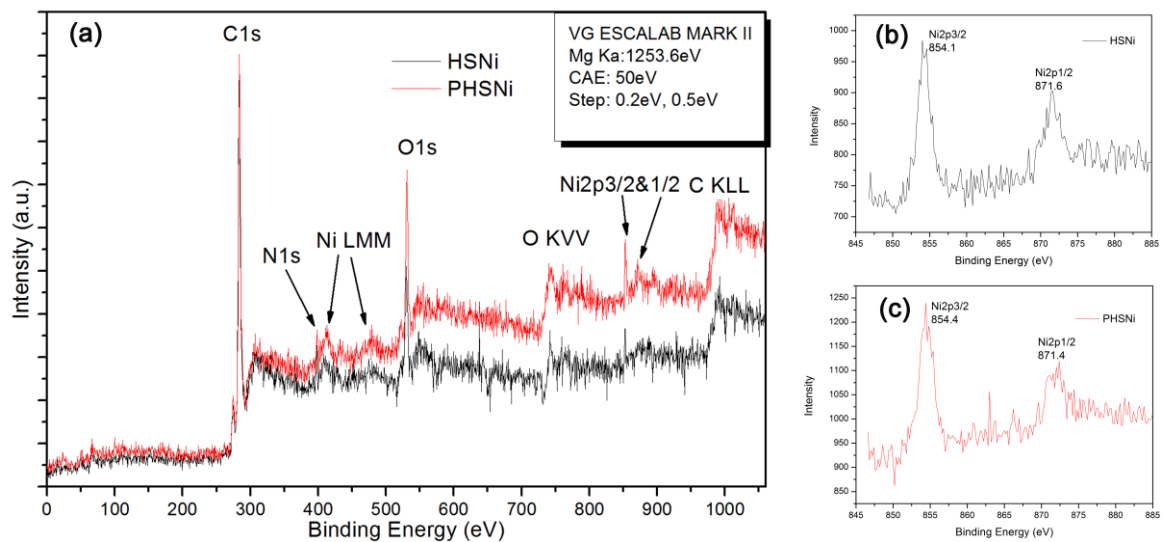

Figure S10. XPS spectra of HSNi and PHSNi (a); expanded view of HSNi (b) and PHSNi (c) in the region from 845 to 885 eV.
